# Supplementary material for: The Use of Zooplankton Metrics to Determine the Trophic Status and Ecological Potential: An Approach in a Large Mediterranean Watershed
Source: MDPI journal article supplement (doi:10.3390/w13172382), 2021-08-30
Supplement: s1 [file s1]

# Supplementary Literature Table S1.

SP1. Average physical and chemical data from reservoirs of the Ebro Watershed. Samples= Number of years that a reservoir was sampled, Depth = reservoir maximum sampling depth, Volume = reservoir maximum volume, T = Temperature, DO = Dissolved oxygen, SD = Secchi disk depth, SS= Suspend solids, Chl-*a* = chlorophyll *a*, TP = Total phosphorus.

| Code | Reservoir  | Samples | Depth  | Volume             | T     | DO     | Conductivity | pH   | SD    | SS     | Turbidity | Chl- <i>a</i> | PT     |
|------|------------|---------|--------|--------------------|-------|--------|--------------|------|-------|--------|-----------|---------------|--------|
|      |            |         | (m)    | (hm <sup>3</sup> ) | °C    | (mg/L) | (µS/cm)      |      | (m)   | (mg/L) | (NTU)     | (µg/L)        | (µg/L) |
| ALB  | Albiña     | 5       | 18.98  | 3.47               | 19.50 | 7.44   | 94           | 7.72 | 2.97  | 2.37   | 4.99      | 2.85          | 8.27   |
| ALL  | Alloz      | 4       | 38.13  | 51.64              | 21.53 | 8.61   | 640          | 8.21 | 3.05  | 3.11   | 2.41      | 1.68          | 5.63   |
| ARD  | Ardisa     | 2       | 7.30   | 1.41               | 18.75 | 9.30   | 277          | 8.43 | 0.55  | 25.52  | 15.92     | 1.09          | 33.45  |
| BAL  | Balaguer   | 4       | 4.25   | 0.95               | 19.81 | 9.02   | 242          | 8.05 | 2.41  | 6.37   | 3.77      | 2.99          | 13.82  |
| BAR  | Barasona   | 7       | 24.93  | 63.50              | 23.01 | 8.12   | 277          | 8.26 | 3.50  | 3.10   | 3.34      | 2.58          | 10.27  |
| BAS  | Baserca    | 2       | 31.25  | 15.00              | 13.31 | 9.24   | 38           | 7.58 | 11.70 | 0.50   | 0.99      | 1.32          | 1.54   |
| BUB  | Búbal      | 2       | 35.00  | 39.75              | 19.40 | 8.61   | 141          | 8.54 | 6.40  | 0.84   | 1.08      | 2.07          | 7.15   |
| CAL  | Calanda    | 6       | 26.20  | 26.96              | 23.15 | 7.63   | 599          | 8.22 | 3.78  | 2.93   | 2.07      | 1.32          | 6.70   |
| CAM  | Camarasa   | 3       | 58.47  | 116.84             | 19.65 | 8.83   | 186          | 8.37 | 5.10  | 1.86   | 3.12      | 1.76          | 6.66   |
| CAN  | Canelles   | 2       | 107.75 | 443.55             | 24.33 | 9.95   | 233          | 8.12 | 3.75  | 1.89   | 1.82      | 2.34          | 6.33   |
| CAS  | Caspe      | 6       | 24.08  | 39.52              | 23.76 | 7.29   | 1121         | 8.25 | 3.36  | 3.69   | 2.81      | 3.70          | 11.27  |
| CAV  | Cavallers  | 2       | 69.35  | 15.35              | 14.92 | 9.26   | 13           | 6.94 | 17.60 | 0.24   | 0.49      | 0.82          | 1.89   |
| CER  | Cereceda   | 2       | 11.15  | 1.62               | 19.40 | 8.65   | 241          | 8.14 | 1.23  | 10.74  | 7.82      | 7.01          | 33.18  |
| CIU  | Çiurana    | 4       | 36.45  | 9.50               | 19.38 | 9.66   | 536          | 8.27 | 6.08  | 1.95   | 1.90      | 1.23          | 6.80   |
| COR  | El Cortijo | 2       | 7.70   | 0.90               | 21.35 | 8.10   | 467          | 8.01 | 1.25  | 10.16  | 7.06      | 2.17          | 95.86  |
| CUE  | Foradada   | 9       | 16.77  | 12.25              | 21.32 | 6.94   | 895          | 7.99 | 2.56  | 5.83   | 4.00      | 5.84          | 20.97  |
| EBR  | Ebro       | 10      | 17.74  | 392.24             | 20.38 | 7.44   | 205          | 8.08 | 3.38  | 2.53   | 3.36      | 4.35          | 15.93  |
| ESC  | Escales    | 2       | 90.00  | 142.30             | 20.92 | 9.94   | 175          | 8.62 | 6.20  | 1.29   | 1.49      | 2.53          | 4.83   |
| ESR  | Escarra    | 1       | 17.00  | 3.50               | 18.40 | 8.34   | 144          | 8.43 | 5.70  | 1.57   | 1.88      | 1.14          | 2.25   |
| EST  | Alcañiz    | 4       | 4.23   | 4.40               | 26.02 | 8.55   | 629          | 8.25 | 2.03  | 6.17   | 4.06      | 3.13          | 11.62  |

|            |             |    |       |         |       |      |      |      |       |       |       |       |       |
|------------|-------------|----|-------|---------|-------|------|------|------|-------|-------|-------|-------|-------|
| <b>EUG</b> | Eugui       | 3  | 30.33 | 16.02   | 20.79 | 7.81 | 164  | 8.02 | 5.03  | 1.36  | 2.33  | 2.12  | 10.37 |
| <b>FLI</b> | Flix        | 7  | 8.43  | 3.73    | 22.58 | 4.59 | 978  | 7.92 | 4.16  | 2.14  | 2.83  | 1.53  | 60.86 |
| <b>GAL</b> | Gallipuéñ   | 7  | 13.71 | 2.59    | 21.51 | 8.31 | 549  | 8.14 | 2.44  | 6.39  | 4.64  | 3.43  | 16.15 |
| <b>GRA</b> | El Grado    | 2  | 68.10 | 314.05  | 19.90 | 8.50 | 236  | 8.27 | 5.75  | 1.41  | 1.76  | 1.01  | 2.32  |
| <b>GUI</b> | Guiamets    | 7  | 31.99 | 7.13    | 23.12 | 9.49 | 405  | 8.34 | 2.48  | 4.70  | 4.59  | 4.68  | 14.21 |
| <b>IRA</b> | Irabia      | 4  | 27.60 | 7.76    | 18.00 | 7.03 | 153  | 7.91 | 5.13  | 1.68  | 1.59  | 2.53  | 6.39  |
| <b>ITO</b> | Itoiz       | 3  | 68.70 | 281.27  | 21.75 | 8.26 | 198  | 8.43 | 4.83  | 1.77  | 2.29  | 1.47  | 5.70  |
| <b>LAN</b> | Lanuza      | 2  | 43.25 | 15.15   | 16.00 | 9.10 | 111  | 8.06 | 5.98  | 1.00  | 0.97  | 1.26  | 8.28  |
| <b>LEC</b> | Lechago     | 7  | 10.26 | 2.73    | 19.76 | 6.38 | 1364 | 7.86 | 3.71  | 3.37  | 4.17  | 4.87  | 15.19 |
| <b>LLA</b> | Llauset     | 2  | 64.40 | 15.20   | 11.27 | 9.16 | 55   | 7.75 | 16.00 | 0.36  | 0.49  | 0.61  | 1.63  |
| <b>LOT</b> | La Loteta   | 5  | 10.98 | 42.86   | 21.51 | 8.15 | 950  | 8.22 | 1.44  | 11.07 | 8.68  | 4.32  | 21.31 |
| <b>MAE</b> | Maidevera   | 4  | 33.38 | 14.94   | 21.93 | 8.89 | 403  | 8.22 | 2.40  | 5.54  | 3.94  | 5.87  | 13.96 |
| <b>MAN</b> | Mansilla    | 4  | 35.08 | 37.17   | 20.18 | 7.89 | 151  | 8.23 | 4.55  | 1.56  | 1.52  | 2.33  | 9.85  |
| <b>MAR</b> | Margalef    | 5  | 23.90 | 2.26    | 21.77 | 8.76 | 360  | 8.14 | 3.59  | 2.72  | 2.52  | 4.84  | 15.54 |
| <b>MED</b> | Mediano     | 2  | 43.70 | 258.60  | 22.52 | 8.40 | 224  | 8.21 | 3.00  | 2.53  | 2.13  | 1.84  | 2.57  |
| <b>MEQ</b> | Mequinenza  | 8  | 52.91 | 1151.85 | 24.94 | 5.99 | 1022 | 8.09 | 4.34  | 2.05  | 2.17  | 3.91  | 12.80 |
| <b>MEZ</b> | Mezalocha   | 8  | 9.95  | 2.19    | 18.96 | 8.45 | 523  | 8.26 | 1.70  | 27.55 | 21.77 | 6.07  | 41.77 |
| <b>MOA</b> | Montearagon | 2  | 29.60 | 10.00   | 21.30 | 6.20 | 341  | 8.17 | 3.33  | 3.01  | 3.31  | 2.43  | 2.80  |
| <b>MON</b> | Vicariás    | 6  | 6.85  | 4.55    | 22.66 | 7.00 | 844  | 8.02 | 1.71  | 7.93  | 7.94  | 1.91  | 9.28  |
| <b>MOV</b> | Moneva      | 5  | 5.28  | 1.77    | 22.70 | 7.27 | 950  | 8.12 | 1.58  | 13.70 | 14.66 | 6.66  | 41.78 |
| <b>OLI</b> | Oliana      | 9  | 47.15 | 68.13   | 22.15 | 7.76 | 214  | 8.48 | 3.12  | 3.78  | 3.59  | 8.79  | 22.08 |
| <b>ORT</b> | Ortigosa    | 5  | 29.60 | 21.89   | 19.10 | 8.01 | 150  | 8.07 | 5.54  | 2.17  | 1.83  | 1.86  | 8.64  |
| <b>PAJ</b> | Pajares     | 4  | 45.25 | 54.75   | 16.94 | 8.03 | 70   | 7.56 | 5.25  | 1.20  | 2.15  | 2.32  | 5.83  |
| <b>PEN</b> | La Peña     | 4  | 25.65 | 13.30   | 18.52 | 9.29 | 322  | 8.34 | 4.13  | 2.20  | 1.63  | 1.55  | 3.85  |
| <b>PEÑ</b> | Pena        | 8  | 11.14 | 11.17   | 20.58 | 8.14 | 279  | 8.18 | 1.09  | 9.41  | 10.00 | 3.88  | 20.90 |
| <b>PUE</b> | Puentelarra | 1  | 5.00  | 0.90    | 23.70 | 7.60 | 294  | 8.31 | 2.55  | 1.66  | 3.86  | 2.03  | 16.80 |
| <b>RIA</b> | Rialb       | 10 | 56.83 | 315.19  | 23.13 | 7.68 | 218  | 8.33 | 2.56  | 2.96  | 3.43  | 5.30  | 15.64 |
| <b>RIB</b> | Ribarroja   | 8  | 28.38 | 203.27  | 24.05 | 7.36 | 906  | 8.14 | 2.94  | 3.11  | 3.15  | 12.94 | 42.80 |
| <b>SAB</b> | Sabiñanigo  | 1  | 10.80 | 0.90    | 14.60 | 9.09 | 204  | 7.83 | 2.60  | 22.62 | 1.97  | 0.01  | 7.24  |
| <b>SAN</b> | Santa Ana   | 4  | 48.20 | 127.13  | 15.05 | 9.88 | 281  | 8.16 | 3.72  | 1.35  | 1.51  | 1.63  | 10.54 |

|            |             |    |       |        |       |       |     |      |      |       |       |       |        |
|------------|-------------|----|-------|--------|-------|-------|-----|------|------|-------|-------|-------|--------|
| <b>SLO</b> | San Lorenzo | 3  | 9.00  | 8.60   | 20.73 | 8.67  | 197 | 8.18 | 2.03 | 3.84  | 3.19  | 2.68  | 13.13  |
| <b>SOB</b> | Sobrón      | 10 | 26.84 | 17.88  | 22.24 | 7.35  | 312 | 8.07 | 2.57 | 2.88  | 3.91  | 7.08  | 23.98  |
| <b>SOP</b> | Sopeira     | 1  | 15.10 | 1.00   | 11.63 | 9.10  | 171 | 7.87 | 4.25 | 0.91  | 1.40  | 0.40  | 3.59   |
| <b>SOT</b> | Sotonera    | 8  | 17.73 | 131.49 | 23.61 | 8.00  | 333 | 8.26 | 2.20 | 4.11  | 3.06  | 3.20  | 11.28  |
| <b>STO</b> | Santolea    | 3  | 23.83 | 25.20  | 23.60 | 8.02  | 519 | 8.17 | 4.92 | 1.94  | 1.30  | 1.18  | 6.30   |
| <b>TAL</b> | Talarn      | 2  | 47.65 | 165.10 | 19.65 | 9.19  | 173 | 8.55 | 4.46 | 2.09  | 1.69  | 3.60  | 8.49   |
| <b>TER</b> | Terradets   | 6  | 12.33 | 28.16  | 18.00 | 8.36  | 173 | 8.14 | 0.93 | 20.79 | 19.29 | 1.83  | 25.96  |
| <b>TOR</b> | Las Torcas  | 5  | 19.26 | 4.54   | 20.31 | 9.46  | 491 | 8.16 | 3.86 | 2.77  | 2.55  | 2.27  | 10.07  |
| <b>TRA</b> | Tranquera   | 9  | 26.77 | 44.58  | 23.44 | 9.41  | 644 | 8.20 | 3.15 | 3.80  | 2.15  | 10.00 | 16.75  |
| <b>ULL</b> | Ullivari    | 5  | 22.76 | 114.36 | 20.44 | 7.72  | 257 | 8.31 | 5.31 | 1.35  | 3.69  | 2.70  | 12.64  |
| <b>URD</b> | Urdalur     | 1  | 36.00 | 5.46   | 14.80 | 8.75  | 119 | 7.76 | 5.80 | 1.17  | 3.46  | 1.59  | 3.81   |
| <b>URR</b> | Urrunaga    | 7  | 17.06 | 56.18  | 20.78 | 7.41  | 180 | 8.22 | 4.36 | 1.36  | 3.05  | 3.33  | 16.65  |
| <b>UTC</b> | Utexa seca  | 4  | 4.60  | 2.48   | 22.28 | 8.78  | 524 | 8.12 | 0.72 | 21.33 | 11.19 | 29.16 | 103.46 |
| <b>VAD</b> | Vadiello    | 3  | 52.93 | 14.22  | 19.23 | 9.16  | 301 | 8.15 | 5.30 | 2.15  | 1.42  | 2.02  | 7.87   |
| <b>VAL</b> | Val         | 9  | 40.99 | 17.81  | 22.12 | 10.20 | 400 | 8.38 | 1.71 | 8.27  | 5.80  | 29.74 | 39.94  |
| <b>YES</b> | Yesa        | 4  | 44.60 | 359.64 | 21.94 | 8.58  | 250 | 8.21 | 2.91 | 2.14  | 2.01  | 1.68  | 4.97   |
